# Supplementary material
Source: MDPI journal article supplement (https://www.mdpi.com/2075-163X/12/2/148)
Supplement: s1 [file s1]

# Supplementary Materials: Improved Recovery and Selectivity of Lanthanide-Ion-Binding Cyclic Peptide Hosts by Changing the Position of Acidic Amino Acids

Yoichi Hosokawa \*, Ayako Oshima, Takaaki Hatanaka and Nobuhiro Ishida \*

Immediately after addition

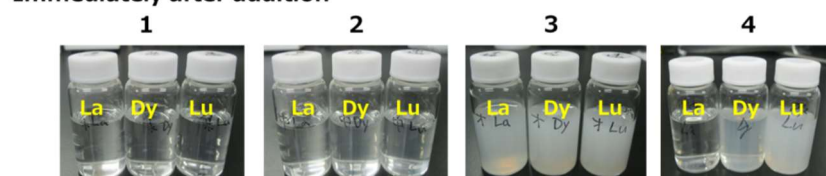

After 12 h

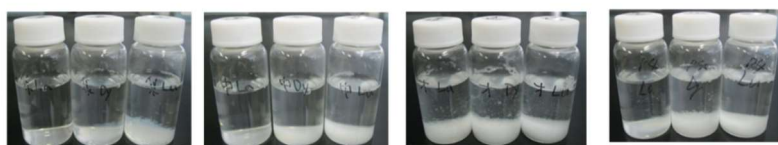

(a)

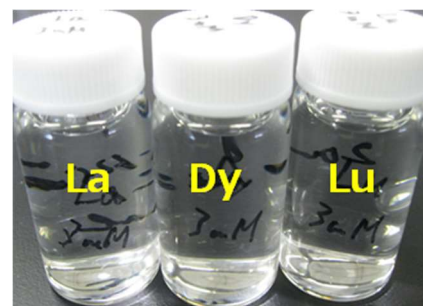

(b)

**Figure S1.** Photographic images of the reactions of precipitate by model peptides. (a) Images immediately after the reaction and 12 h later. (b) Ln control solutions without peptides after 1 month.

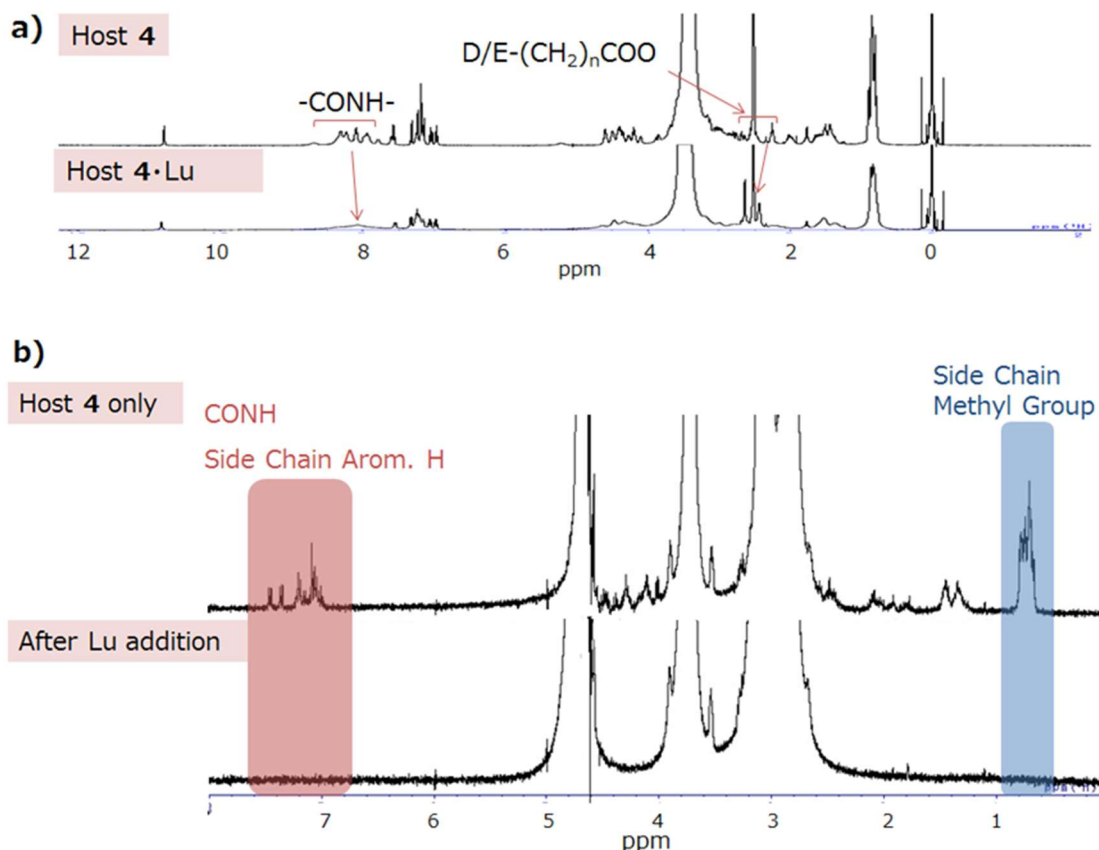

**Figure S2.**  $^1\text{H}$  NMR spectra of (a) host 4 and its Lu precipitate, and (b) the reaction solution before (host 4 only) and after Lu addition (400 MHz, DMSO- $d_6$ ).

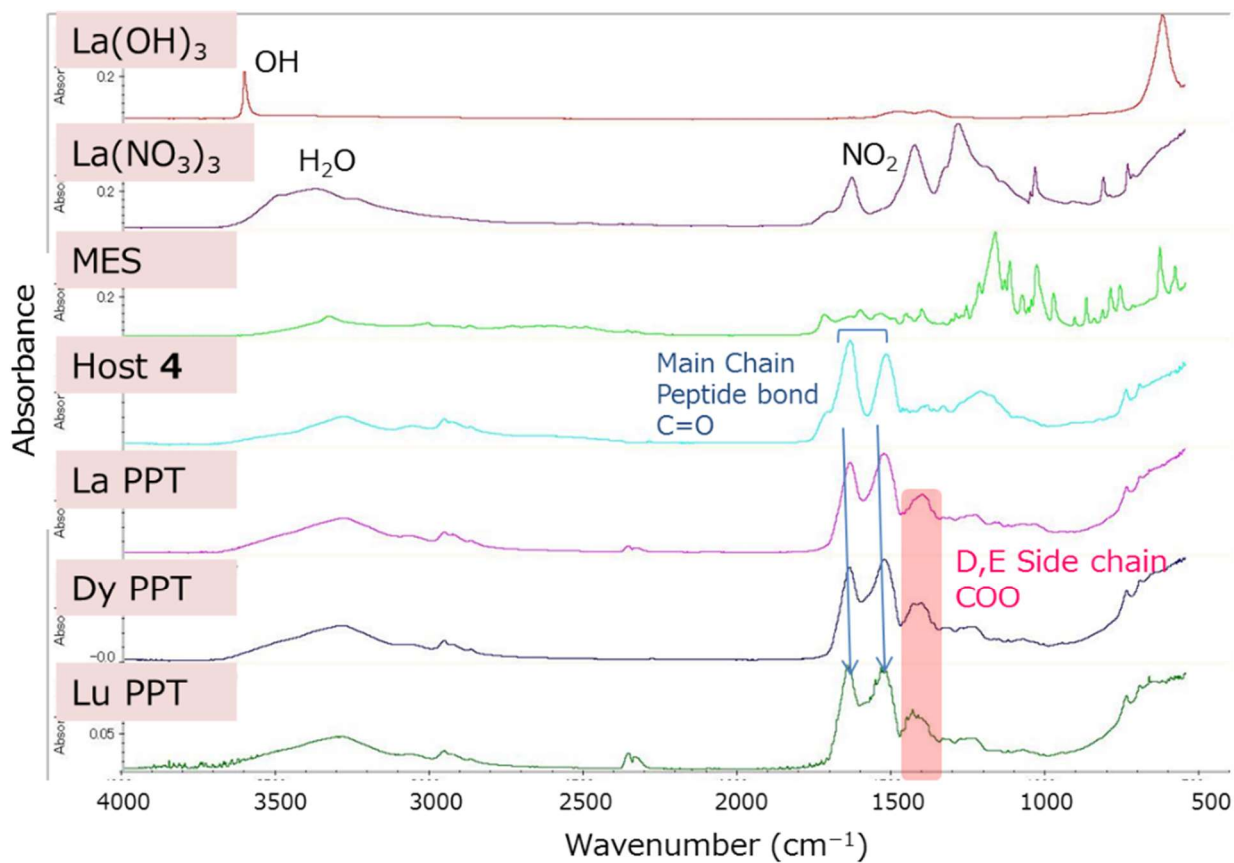

**Figure S3.** ATR-FTIR spectra of host 4 and its precipitates (PPTs), and spectra of related compounds (La salts, MES) for comparison.

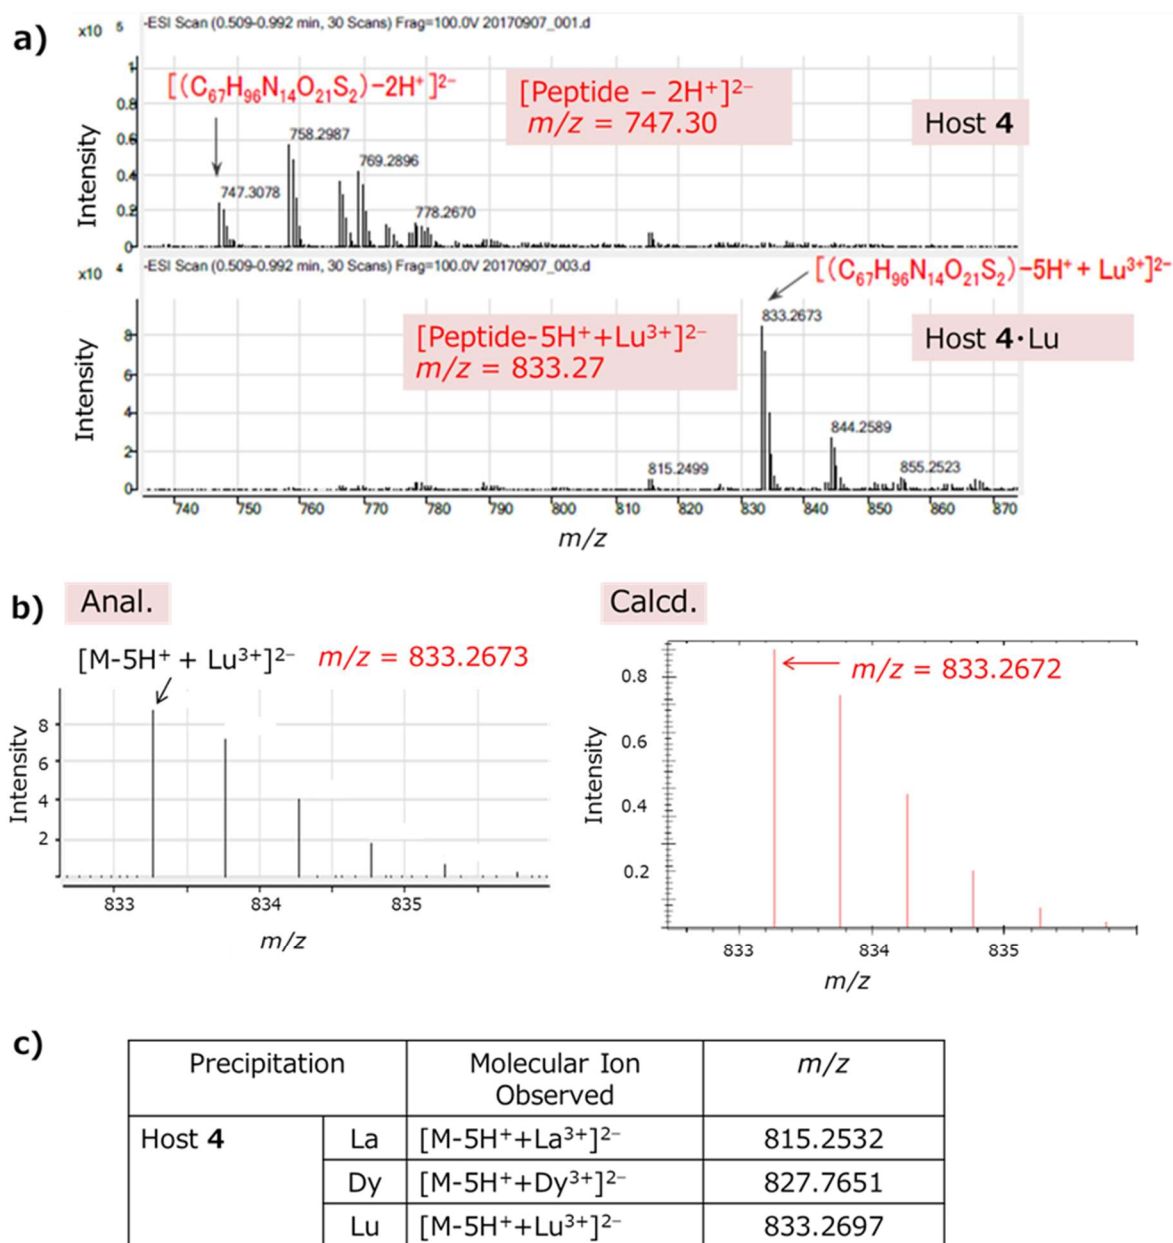

**Figure S4.** (a) ESI-MS spectra of host **4** and its precipitate with Lu (**4**·Lu). (b) Enlarged molecular-ion peak of host **4**·Lu. (c) Summary of the observed molecular-ion formula of the precipitates of host **4** with Ln ions (La, Dy, and Lu).

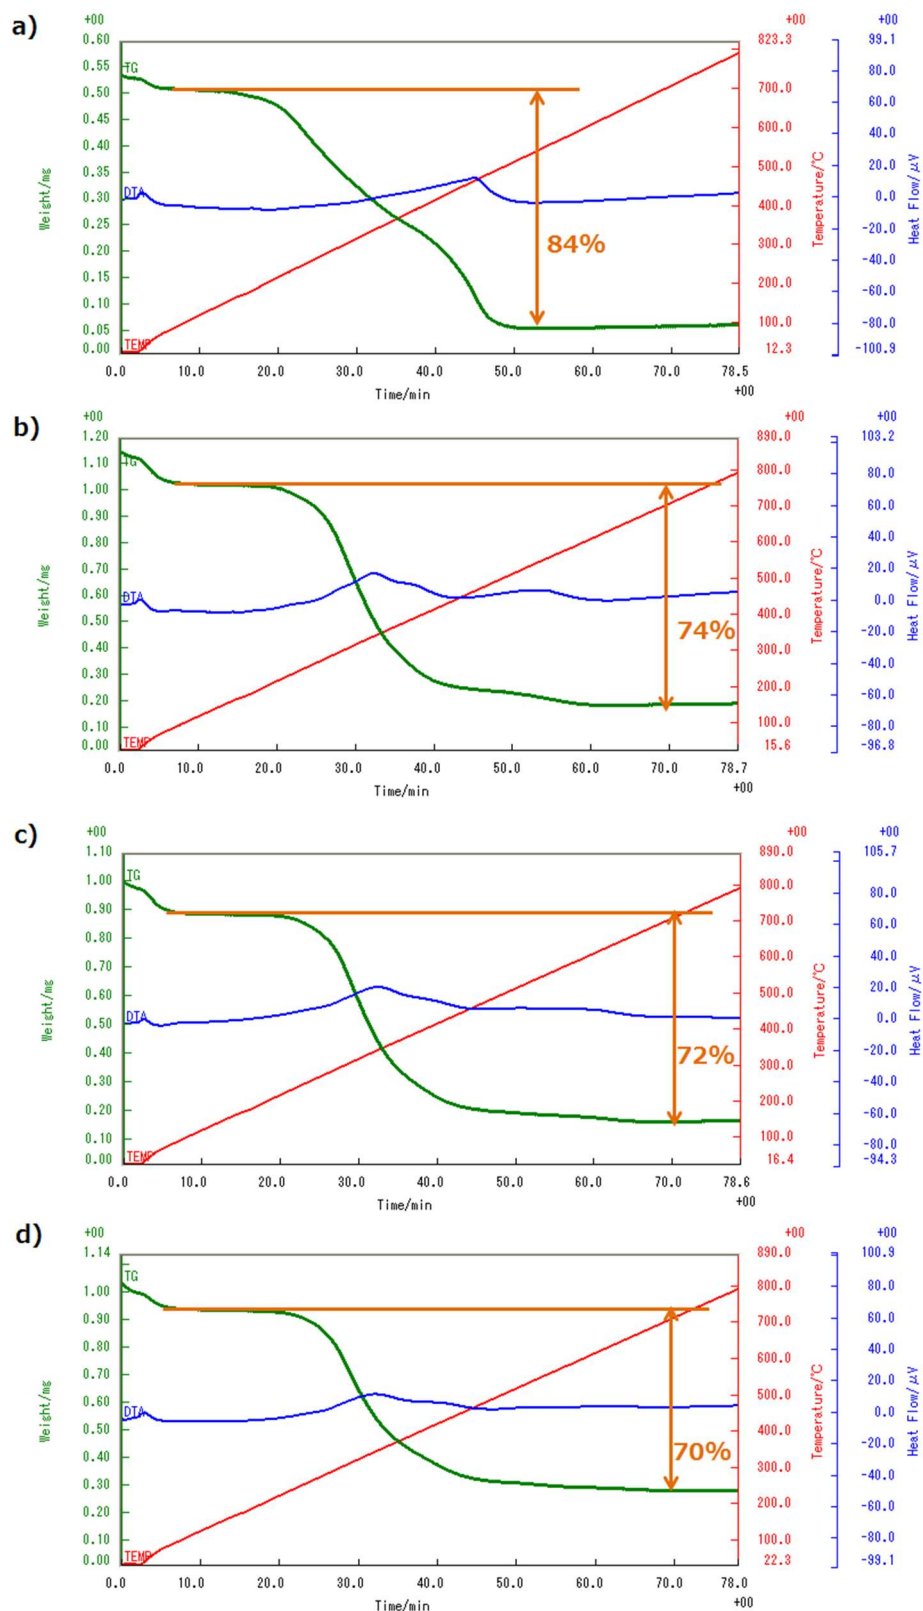

**Figure S5.** TG-DTA charts of a) host 4 and its precipitates with b) La (4-La), c) Dy (4-Dy), and d) Lu (4-Lu). Green: TG (weight / mg). Blue: DTA (heat flow /  $\mu V$ ). Red: Temperature (temperature /  $^{\circ}C$ ).

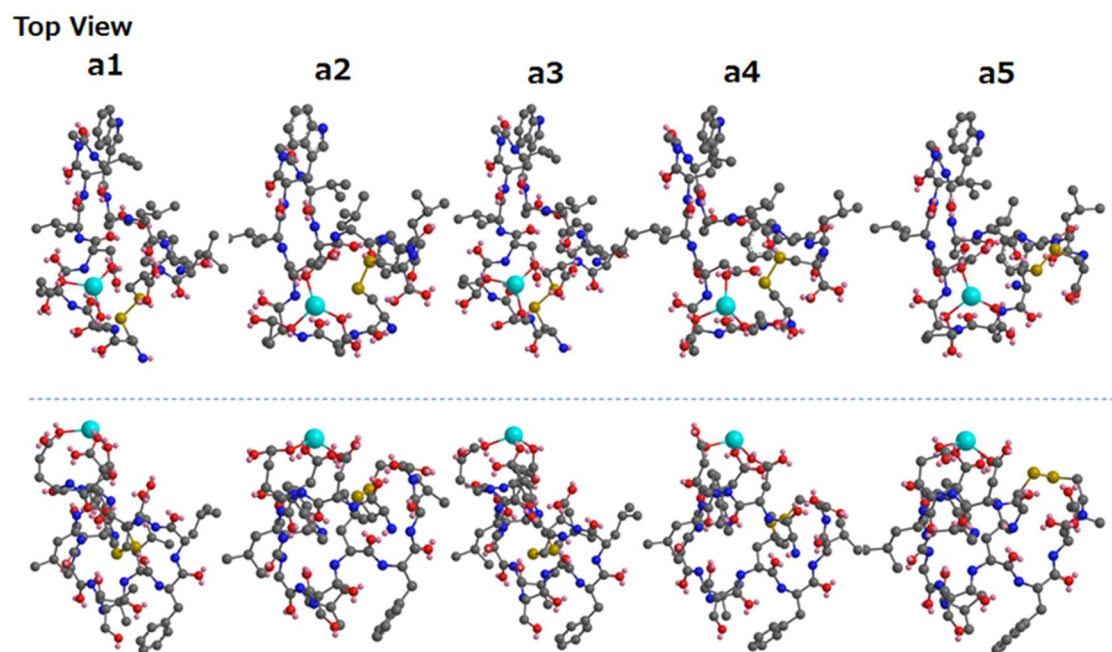

**Side View**

**Figure S6.** MM2 optimized structure of a1-5 in Figure 4.

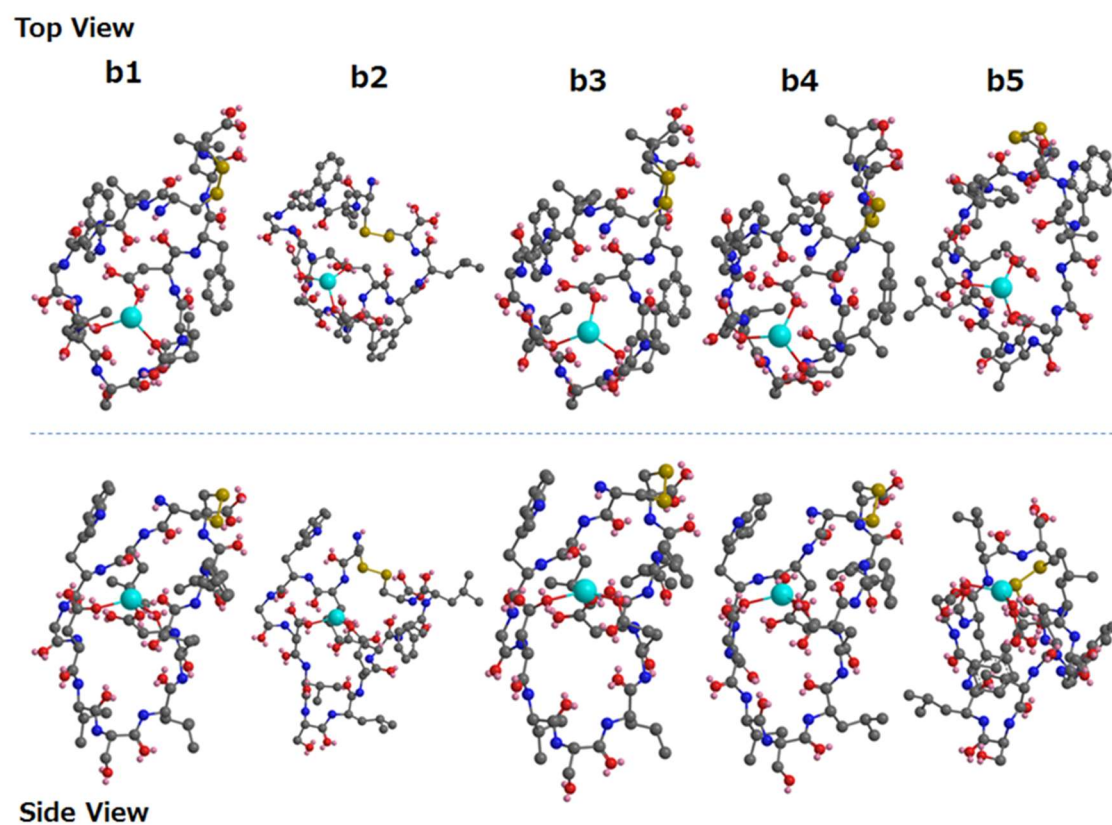

**Figure S7.** MM2 optimized structure of b1-5 in Figure 4.

## Top View

c1

c2

c3

c4

c5

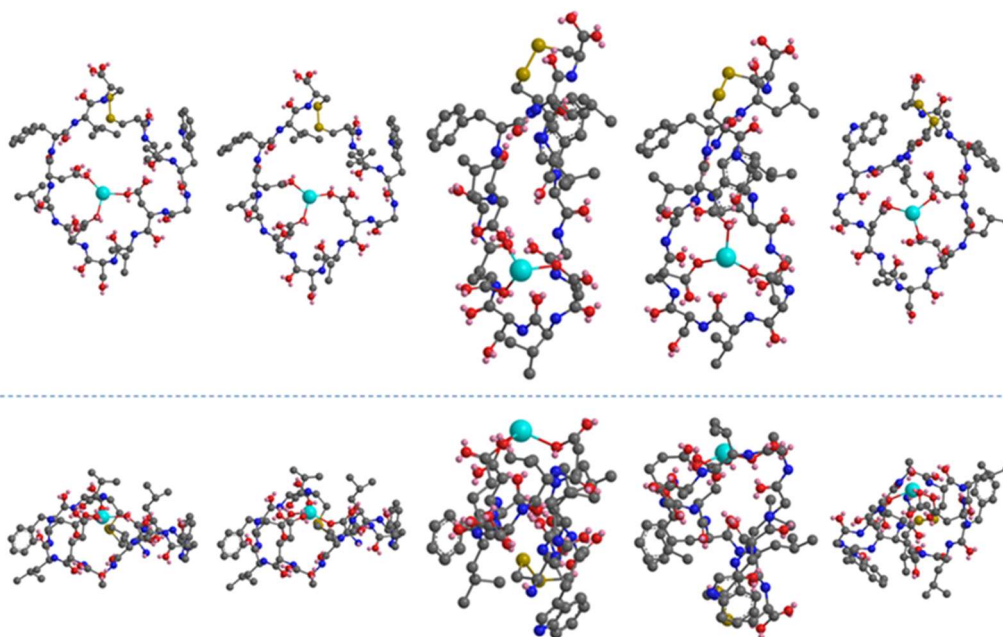

## Side View

Figure S8. MM2 optimized structure of c1-5 in Figure 4.

## Top View

d1

d2

d3

d4

d5

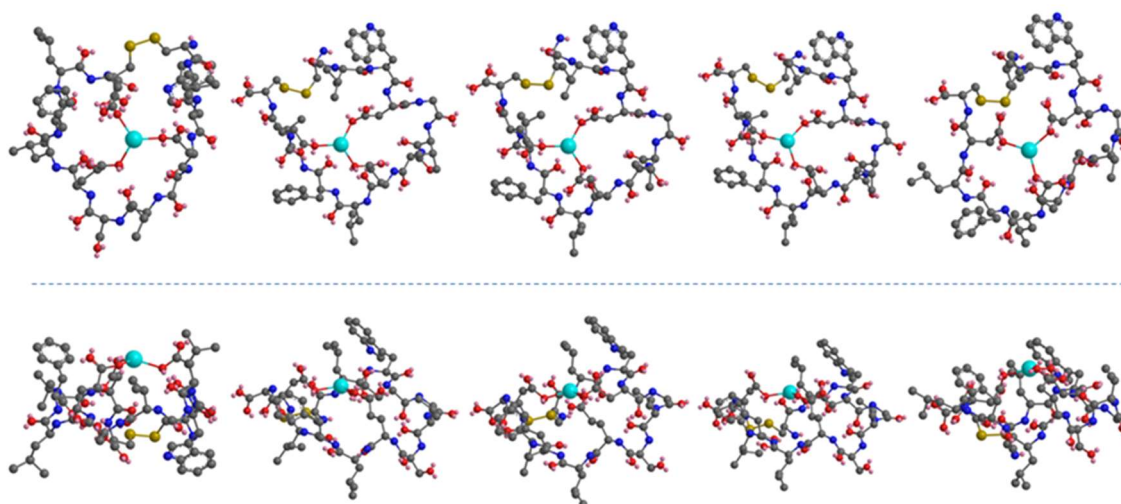

## Side View

Figure S9. MM2 optimized structure of d1-5 in Figure 4.

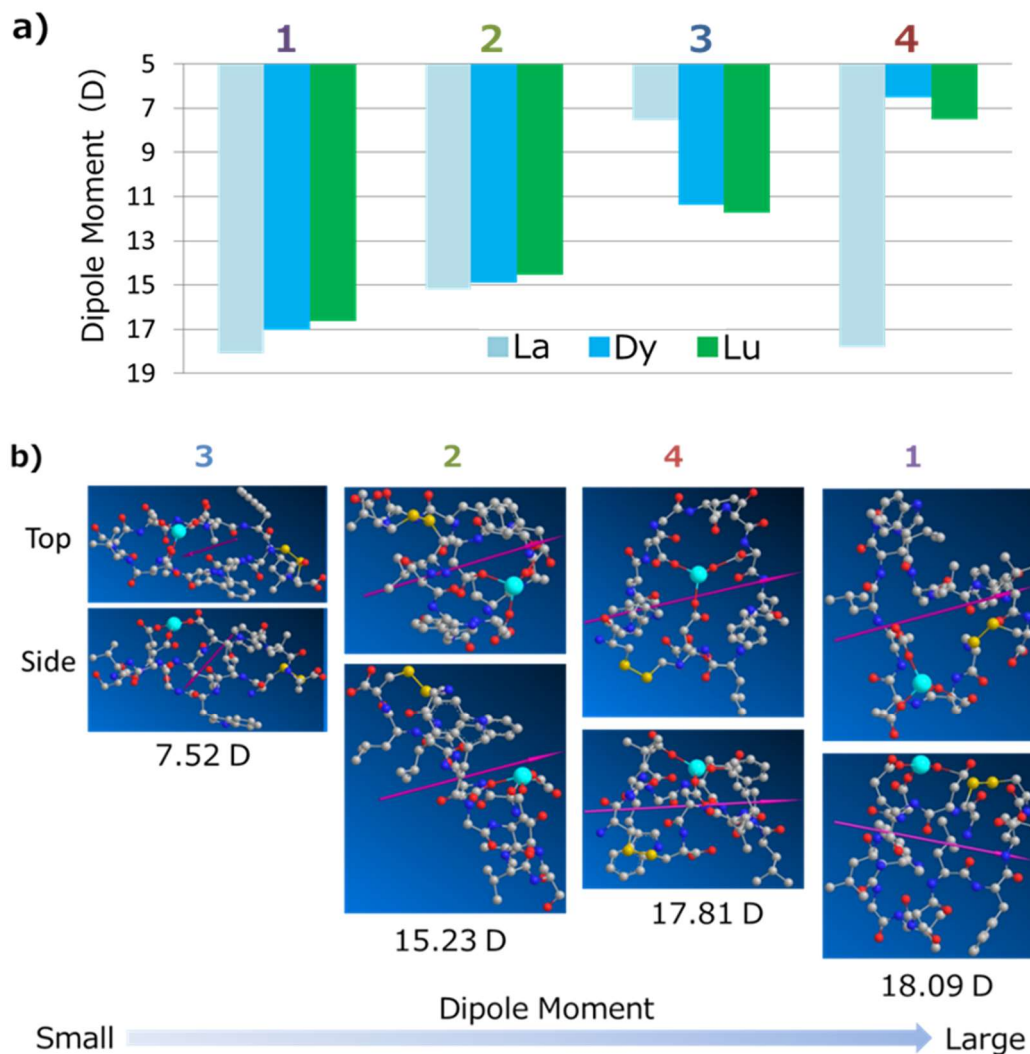

**Figure S10.** (a) DM of each host-Ln complex. (b) DM vector and optimized structure of each host-La complex, as representative results.

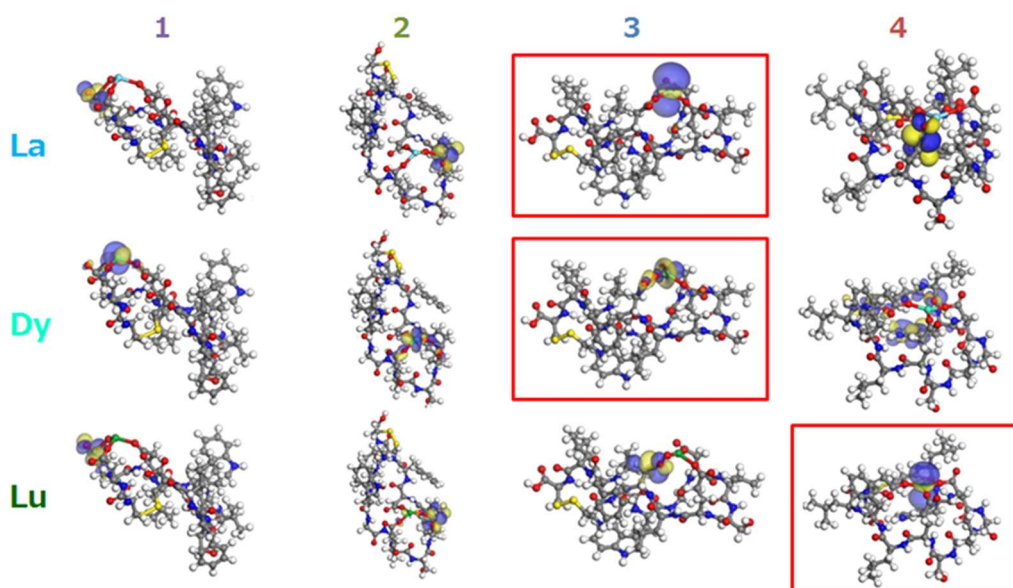

**Figure S11.** LUMO orbital of each host-Ln complex. Complexes with the LUMO centered on the metal element are shown in red boxes.

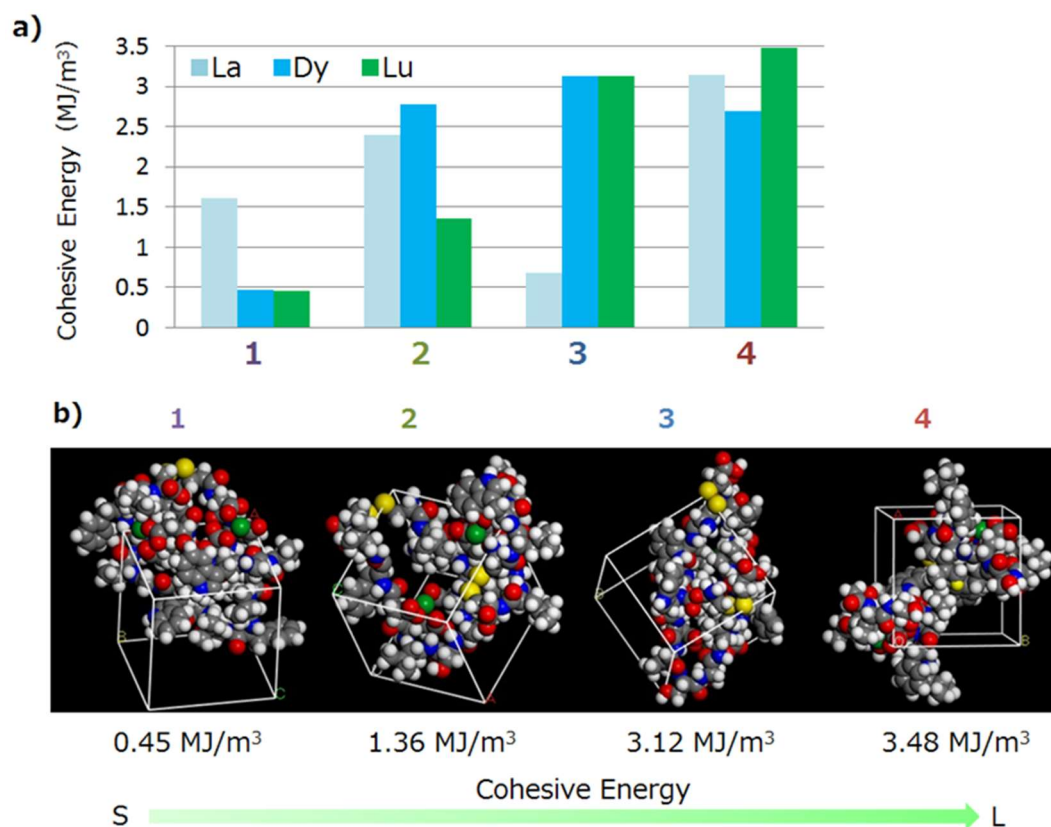

**Figure S12.** Cohesive energy of each host·Ln complex. (a) Bar graph and (b) cohesive structure of each host·Lu complex, as representative results.

**Table S1.** TG-DTA analysis data of host 4 and its precipitate with each Ln complex (Figure S7).

| Compound  | Initial Weight (mg) | Final Weight (mg) | Weight Loss (%)       |       |
|-----------|---------------------|-------------------|-----------------------|-------|
|           |                     |                   | Anal (Temp. Range/°C) | Calcd |
| Host 4    | 0.512               | 0.052             | 84.27 (100 - 550)     | -     |
| Host 4·La | 1.03                | 0.180             | 74.01 (120 - 700)     | 74.31 |
| Host 4·Dy | 0.894               | 0.157             | 72.70 (120 - 700)     | 72.84 |
| Host 4·Lu | 0.946               | 0.282             | 70.20 (120 - 700)     | 72.11 |

**Table S2.** Isolated yield (%) of each host·Ln complex.

|    | Host 1 | Host 2 | Host 3 | Host 4 |
|----|--------|--------|--------|--------|
| La | 1      | 1      | 41     | 11     |
| Dy | 3      | 6      | 57     | 40     |
| Lu | 6      | 12     | 81     | 99     |

**Table S3.** ICP-OES yield (%) of each host-Ln complex.

|    | Host 1 | Host 2 | Host 3 | Host 4 |
|----|--------|--------|--------|--------|
| La | 1      | 1      | 35     | 19     |
| Dy | 0      | 2      | 46     | 26     |
| Lu | 16     | 20     | 78     | 97     |

**Table S4.** Total energy (kcal/mol) of each host-La complex as determined by MM2 calculations.

| La complex Structure | Host 1 | Host 2 | Host 3 | Host 4 |
|----------------------|--------|--------|--------|--------|
| 1                    | −31.8  | 85.5   | 44.2   | −47.4  |
| 2                    | 76.1   | −41.2  | −6.4   | −27.3  |
| 3                    | 41.9   | −11.5  | −23.2  | −27.4  |
| 4                    | 5.4    | −21    | −24    | −27.2  |
| 5                    | 68.7   | −27.8  | −19.1  | −38.8  |

**Table S5.** Re-calculated YD (Left) and YC (Right) using each approximate curve in Figure 6A and 6B.

| YD | Host 1 | Host 2 | Host 3 | Host 4 |
|----|--------|--------|--------|--------|
| La | 0      | 26     | 96     | 2      |
| Dy | 9      | 29     | 61     | 100    |
| Lu | 13     | 32     | 58     | 96     |

| YC | Host 1 | Host 2 | Host 3 | Host 4 |
|----|--------|--------|--------|--------|
| La | 1      | 11     | 0      | 55     |
| Dy | 0      | 27     | 54     | 22     |
| Lu | 0      | 0      | 53     | 100    |

**Table S6.** Simulated yield of each host-Ln complex.

|    | Host 1 | Host 2 | Host 3 | Host 4 |
|----|--------|--------|--------|--------|
| La | 0      | 9      | 48     | 14     |
| Dy | 2      | 14     | 57     | 37     |
| Lu | 3      | 8      | 28     | 98     |
